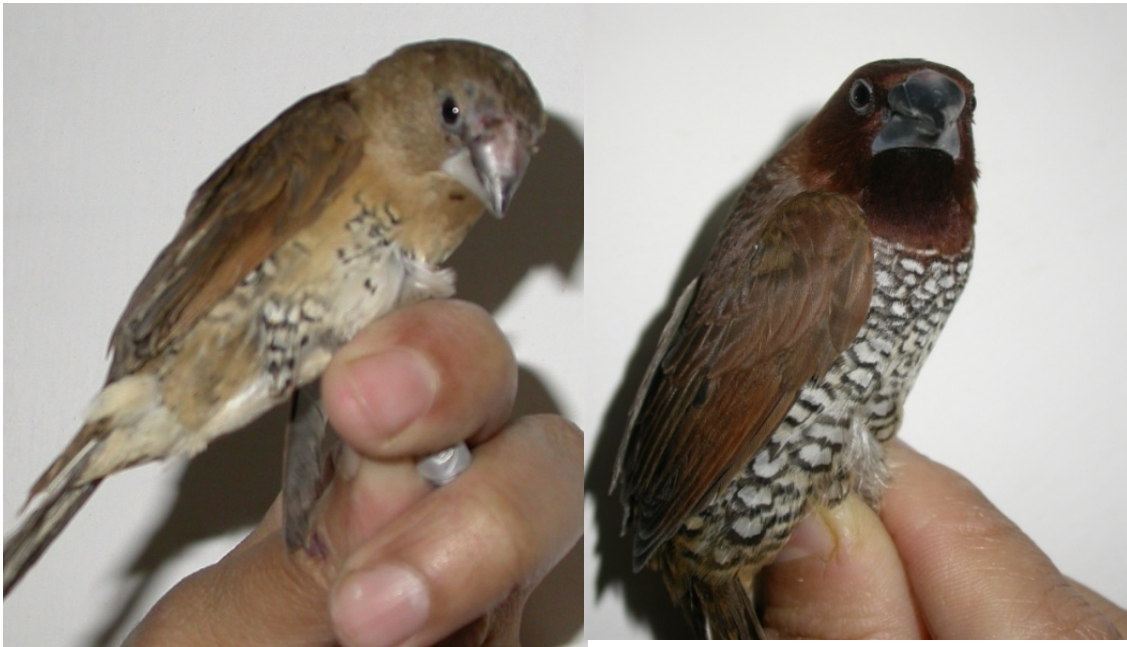

Juvenile

Adult

**Fig. S1.** Spotted munia (*Lonchura punctulata*) juvenile and adult.

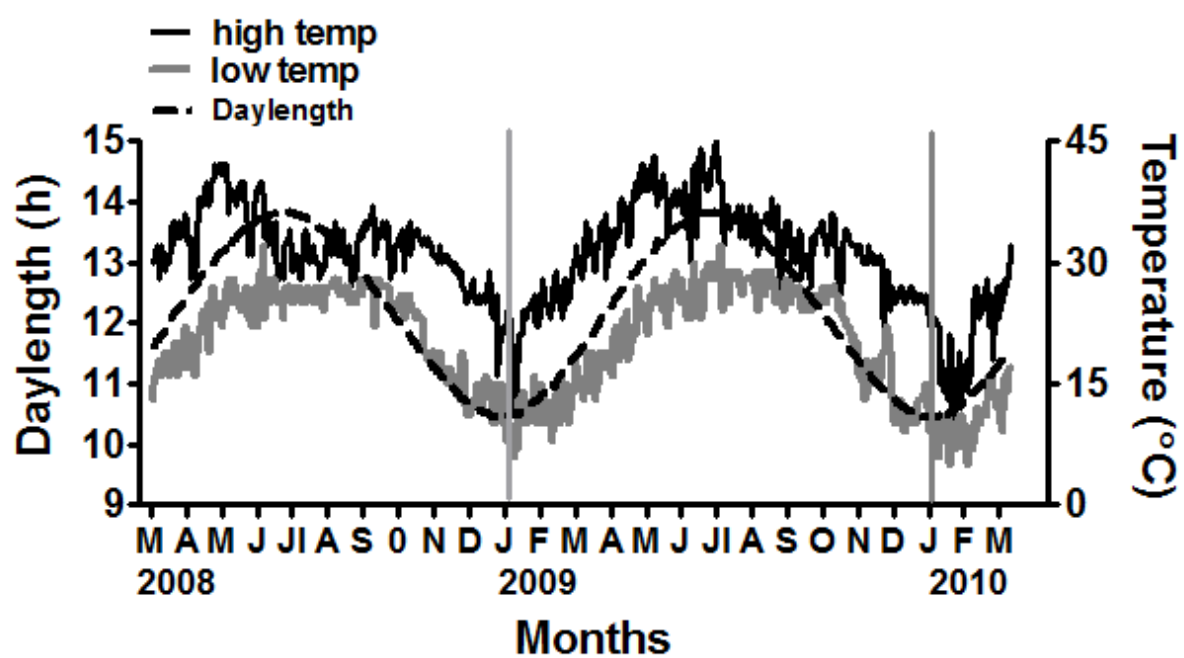

**Fig. S2.** Day length and temperature cycles at Lucknow, India ( $26^{\circ}55'N$ ,  $80^{\circ}59'E$ ) (NDL condition), as per data from the meteorological station.

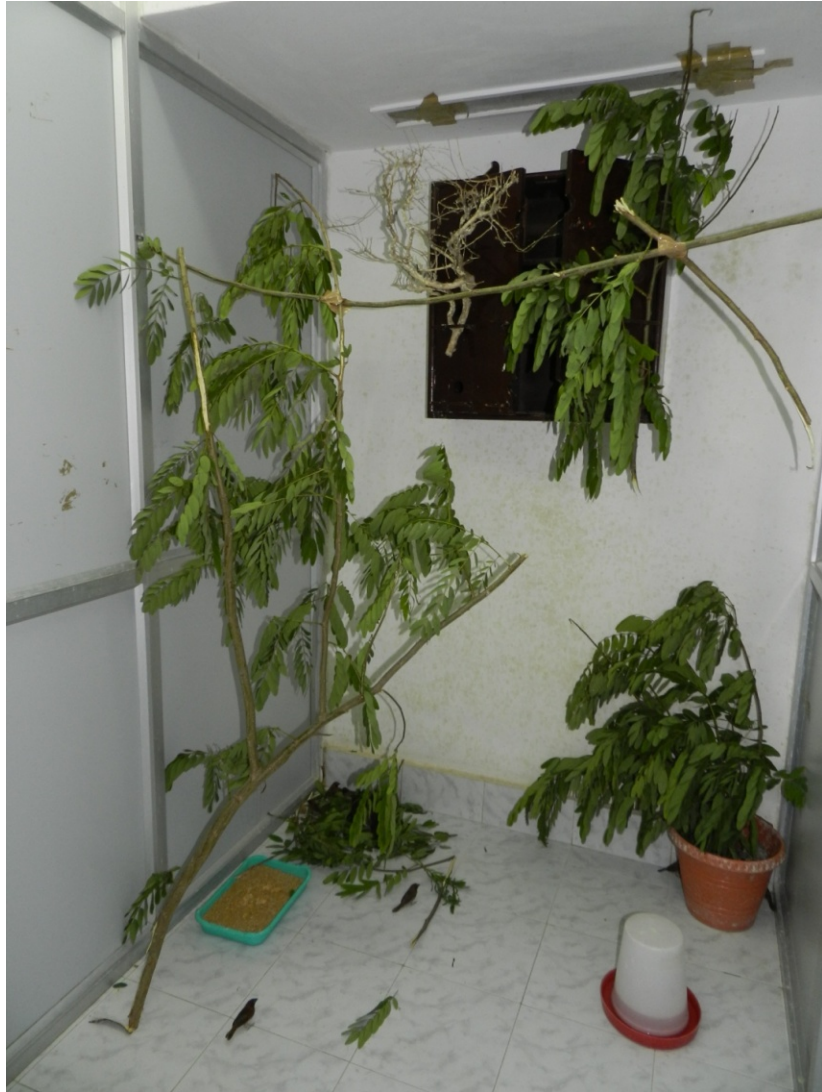

**Fig. S3.** Photograph of one chronocubicle (partly seen, not to size).

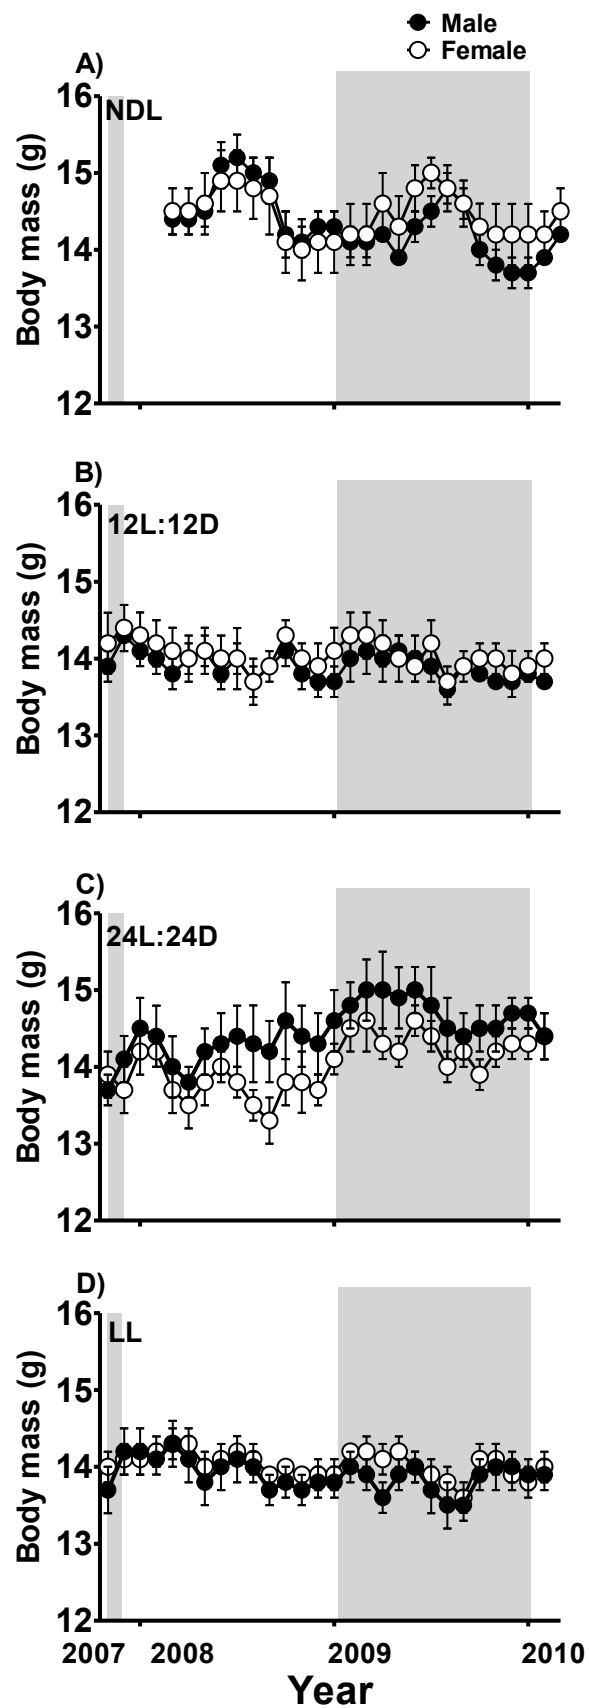

**Fig. S4.** Changes in spotted munia body mass (means  $\pm$  s.e.m.) over the experimental period of 28 months for the (A) ND, (B) 12L:12D, (C) 24L:24D and (D) LL conditions. Note the regular cycle in ND (A) but not in the other light conditions.
